# Supplementary material for: Balanced Crystalloids versus Normal Saline in Adults with Sepsis: A Comprehensive Systematic Review and Meta-Analysis
Source: MDPI journal article supplement (doi:10.3390/jcm11071971), 2022-04-01
Supplement: s1 [file s1]

## Supplementary Appendix

### Balanced Crystalloids versus Normal Saline in Adults with Sepsis: A Comprehensive Systematic Review and Meta-Analysis

#### Supplementary tables

| Title                                                                                    | Page |
|------------------------------------------------------------------------------------------|------|
| Supplementary Table S1: Search strategy used in each database searched.                  | 2    |
| Supplementary Table S2: Quality assessment of the included studies in the meta-analysis. | 3-4  |

#### Supplementary figures:

| Title                                                                                                                                                                   | Page |
|-------------------------------------------------------------------------------------------------------------------------------------------------------------------------|------|
| Supplementary Figure S1: Leave-one-out sensitivity analysis for overall mortality, acute kidney injury, and need for renal replacement therapy.                         | 5    |
| Supplementary Figure S2: Leave-one-out sensitivity analysis for overall mortality by exclusion of the study by Shaw et al.                                              | 6    |
| Supplementary Figure S3: Funnel plot showing publication bias analysis of studies that compared balanced crystalloids versus normal saline regarding overall mortality. | 7    |

Supplementary Table S1: Search strategy used in each database searched.

| Database       | Search Strategy                                                                                                                                                                                                                                                                                                                                                                                                                                                                                                                                                                                                                                                                                                                                                                                                                                                                                                                                                                                                                                                                                                                                                                                                                                                                                                                 | Articles retrieved |
|----------------|---------------------------------------------------------------------------------------------------------------------------------------------------------------------------------------------------------------------------------------------------------------------------------------------------------------------------------------------------------------------------------------------------------------------------------------------------------------------------------------------------------------------------------------------------------------------------------------------------------------------------------------------------------------------------------------------------------------------------------------------------------------------------------------------------------------------------------------------------------------------------------------------------------------------------------------------------------------------------------------------------------------------------------------------------------------------------------------------------------------------------------------------------------------------------------------------------------------------------------------------------------------------------------------------------------------------------------|--------------------|
| PubMed/MEDLINE | ("sepsis"[MeSH Terms] OR "sepsis"[All Fields] OR ("shock, septic"[MeSH Terms] OR ("shock"[All Fields] AND "septic"[All Fields]) OR "septic shock"[All Fields] OR ("septic"[All Fields] AND "shock"[All Fields]))) AND ("saline solution"[MeSH Terms] OR ("saline"[All Fields] AND "solution"[All Fields]) OR "saline solution"[All Fields] OR ("normal"[All Fields] AND "saline"[All Fields]) OR "normal saline"[All Fields] OR (("isotonic"[All Fields] OR "isotonically"[All Fields] OR "isotonicity"[All Fields] OR "isotonics"[All Fields]) AND ("saline solution"[MeSH Terms] OR ("saline"[All Fields] AND "solution"[All Fields]) OR "saline solution"[All Fields] OR "saline"[All Fields] OR "salines"[All Fields]))) AND (((("balance"[All Fields] OR "balanced"[All Fields] OR "balances"[All Fields] OR "balancing"[All Fields]) AND ("crystalloid solutions"[MeSH Terms] OR "crystalloid"[All Fields] AND "solutions"[All Fields]) OR "crystalloid solutions"[All Fields] OR "crystalloid"[All Fields] OR "crystalloids"[All Fields] OR "crystalloidal"[All Fields])) OR ("ringer s lactate"[MeSH Terms] OR ("ringer s"[All Fields] AND "lactate"[All Fields]) OR "ringer s lactate"[All Fields] OR ("lactated"[All Fields] AND "ringer"[All Fields]) OR "lactated ringer"[All Fields]) OR "plasmalyte"[All Fields]) | 97                 |
| Embase         | ('sepsis'/exp OR sepsis OR 'septic shock'/exp OR 'septic shock' OR (septic AND ('shock'/exp OR shock))) AND ('normal saline'/exp OR 'normal saline' OR (normal AND ('saline'/exp OR saline)) OR 'isotonic saline' OR (isotonic AND ('saline'/exp OR saline))) AND ('balanced crystalloids' OR (balanced AND crystalloids) OR 'lactated ringer' OR (lactated AND ringer) OR 'plasmalyte'/exp OR plasmalyte)                                                                                                                                                                                                                                                                                                                                                                                                                                                                                                                                                                                                                                                                                                                                                                                                                                                                                                                      | 156                |
| Web of Science | (sepsis OR (septic shock)) AND ((normal saline) OR (isotonic saline)) AND ((balanced crystalloids) OR (lactated ringer) OR plasmacyte)                                                                                                                                                                                                                                                                                                                                                                                                                                                                                                                                                                                                                                                                                                                                                                                                                                                                                                                                                                                                                                                                                                                                                                                          | 102                |

Supplementary Table S2: Quality assessment of the included studies in the meta-analysis.

| Cohort studies                | Selection                                |                                 |                                    |                                                                          | Comparability                                                   | Outcome                              |                                                      |                               | Quality score |
|-------------------------------|------------------------------------------|---------------------------------|------------------------------------|--------------------------------------------------------------------------|-----------------------------------------------------------------|--------------------------------------|------------------------------------------------------|-------------------------------|---------------|
|                               | Representativeness of the exposed cohort | Selection of non-exposed cohort | Ascertainment of exposure          | Demonstration that outcome of interest was not present at start of study | Comparability of the cohorts on the basis of design or analysis | Assessment of outcome                | Was follow up long enough for outcomes to occur      | Adequacy of follow up cohorts |               |
| Duffy, 2018                   | 1                                        | 1                               | 1                                  | 1                                                                        | 1                                                               | 1                                    | 0                                                    | 1                             | 7             |
| Jaynes, 2017                  | 1                                        | 1                               | 1                                  | 1                                                                        | 1                                                               | 1                                    | 0                                                    | 1                             | 7             |
| Limapichat, 2021              | 1                                        | 1                               | 1                                  | 1                                                                        | 0                                                               | 1                                    | 0                                                    | 1                             | 6             |
| Mao, 2018                     | 1                                        | 1                               | 1                                  | 1                                                                        | 1                                                               | 1                                    | 0                                                    | 0                             | 6             |
| Raghunathan, 2014             | 1                                        | 1                               | 1                                  | 1                                                                        | 1                                                               | 1                                    | 0                                                    | 1                             | 7             |
| Shaw, 2017                    | 1                                        | 1                               | 1                                  | 1                                                                        | 1                                                               | 1                                    | 0                                                    | 0                             | 6             |
| Tseng, 2021                   | 1                                        | 1                               | 1                                  | 1                                                                        | 1                                                               | 1                                    | 1                                                    | 0                             | 7             |
| Randomized controlled studies | Randomization                            |                                 |                                    |                                                                          | Blinding                                                        |                                      | Withdrawals                                          |                               | Quality score |
|                               | Was the study described as randomized?   |                                 | Was the randomization appropriate? |                                                                          | Was the study described as double blind?                        | Was the double blinding appropriate? | Was there a description of withdrawals and dropouts? |                               |               |
| Annane, 2013                  | 1                                        |                                 | 1                                  |                                                                          | 0                                                               | 0                                    | 1                                                    |                               | 3             |
| Finfer, 2022                  | 1                                        |                                 | 1                                  |                                                                          | 1                                                               | 1                                    | 1                                                    |                               | 5             |
| Golla, 2020                   | 1                                        |                                 | 1                                  |                                                                          | 0                                                               | 0                                    | 1                                                    |                               | 3             |
| Pagano, 2020                  | 1                                        |                                 | 1                                  |                                                                          | 0                                                               | 0                                    | 1                                                    |                               | 3             |
| Semler, 2017                  | 1                                        |                                 | 1                                  |                                                                          | 0                                                               | 0                                    | 1                                                    |                               | 3             |
| Semler, 2018                  | 1                                        |                                 | 1                                  |                                                                          | 0                                                               | 0                                    | 1                                                    |                               | 3             |

|                |   |   |   |   |   |   |
|----------------|---|---|---|---|---|---|
| Young, 2015    | 1 | 1 | 1 | 1 | 1 | 5 |
| Zampieri, 2021 | 1 | 1 | 1 | 1 | 1 | 5 |

### Overall Mortality

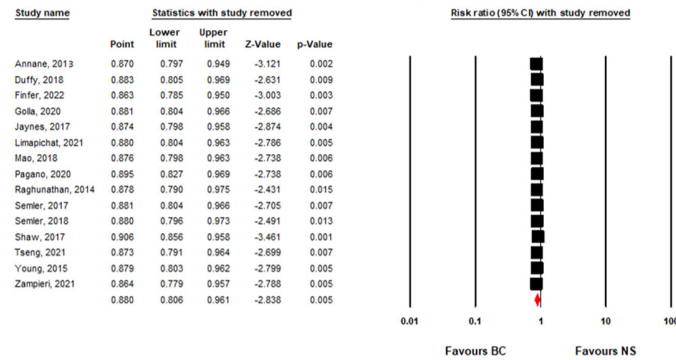

### Acute Kidney Injury

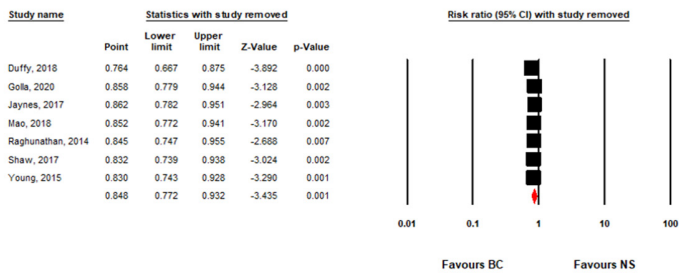

### Need for Renal Replacement Therapy

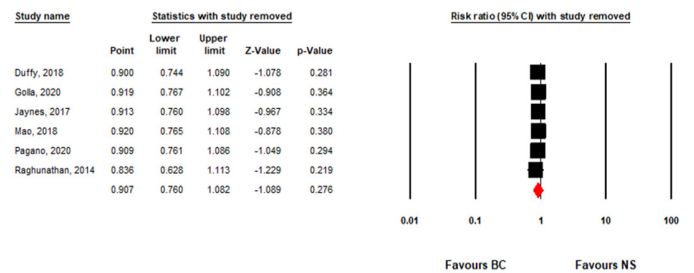

Supplementary Figure S1: Leave-one-out sensitivity analysis for overall mortality, acute kidney injury, and need for renal replacement therapy.

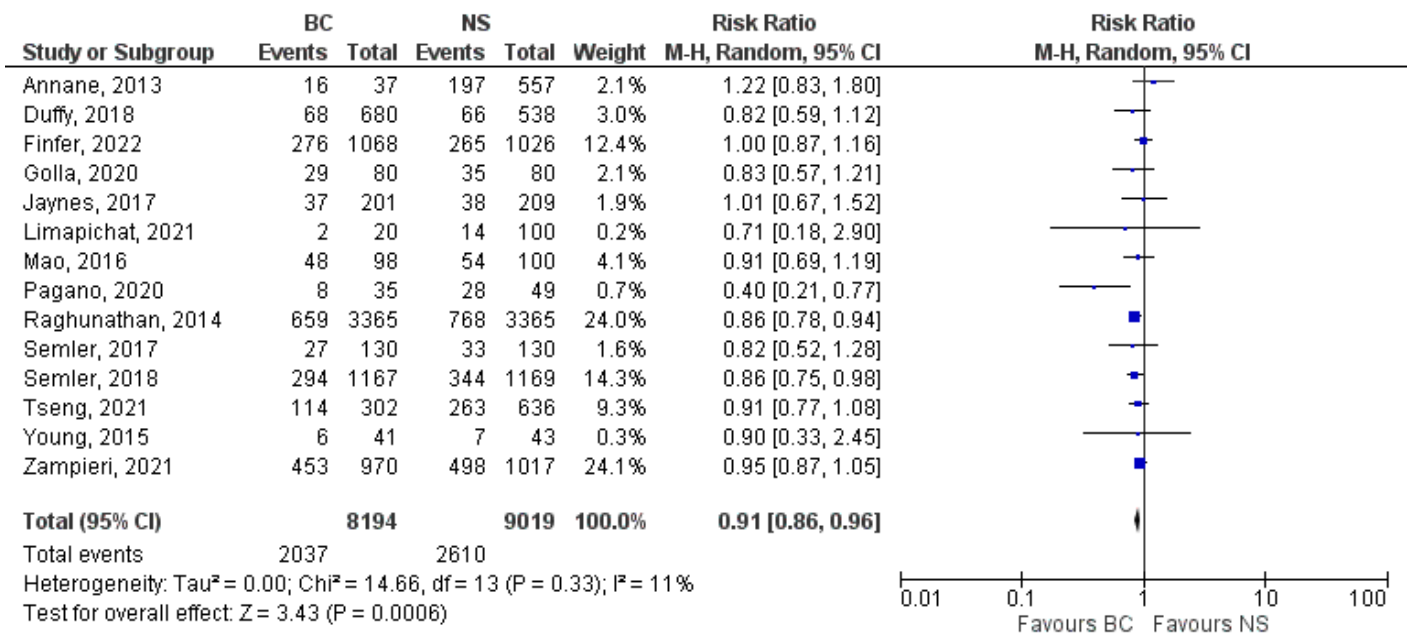

Supplementary Figure S2: Leave-one-out sensitivity analysis for overall mortality by exclusion of the study by Shaw et al.

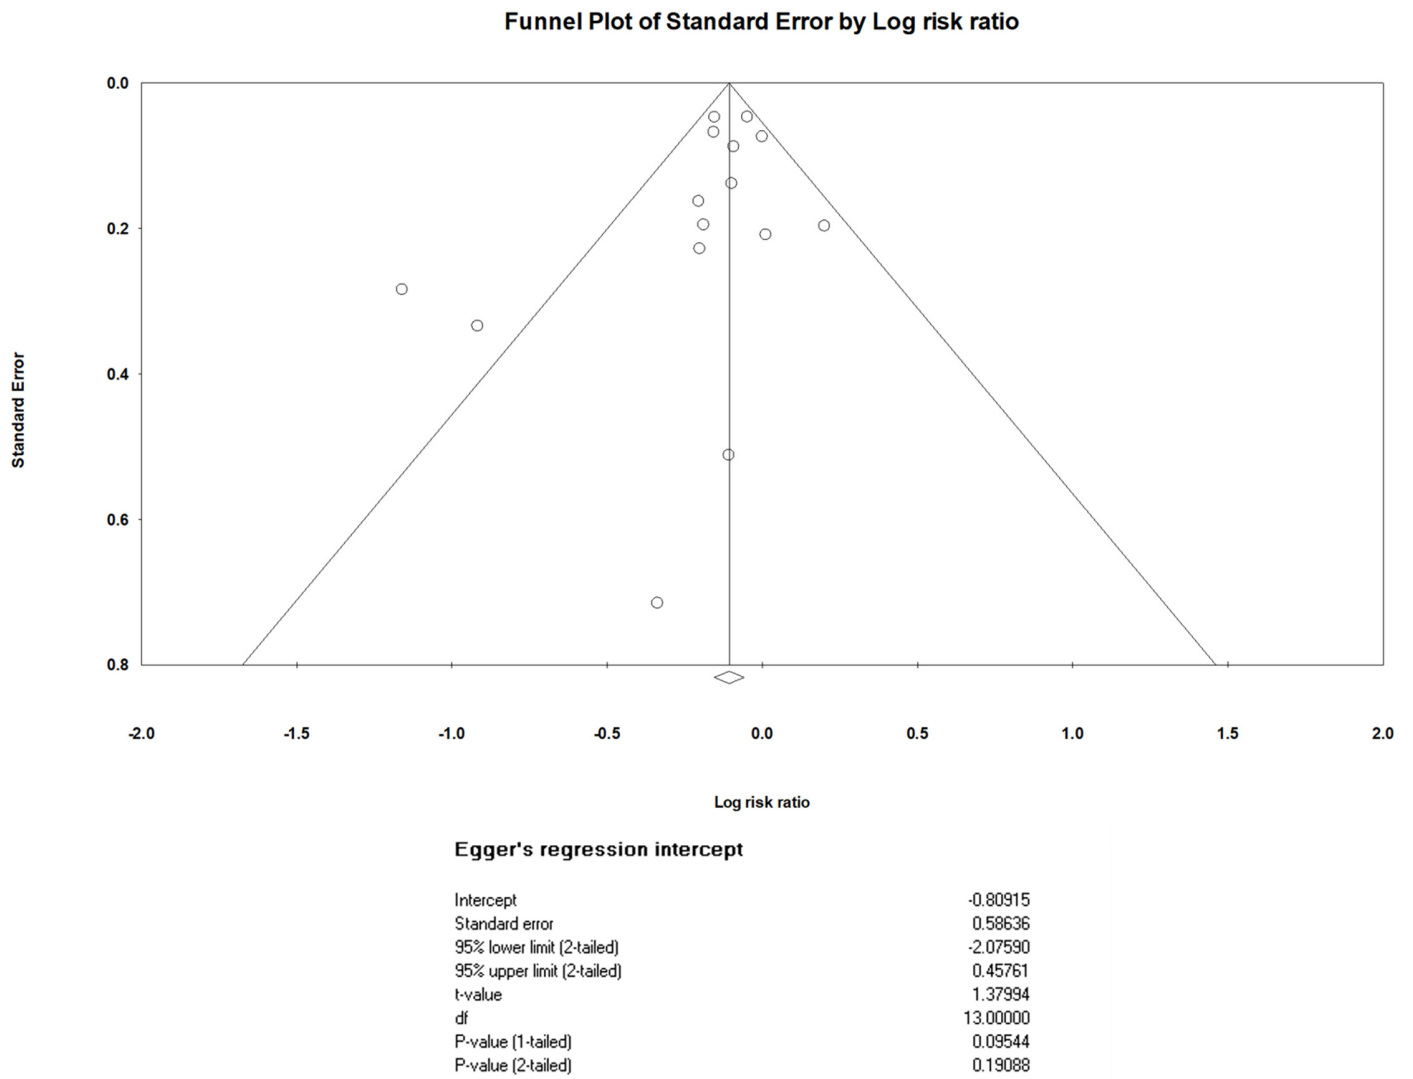

Supplementary Figure S3: Funnel plot showing publication bias analysis of studies that compared balanced crystalloids versus normal saline regarding overall mortality.
